# Supplementary material for: Condition-dependent generation of aquaporin-4 antibodies from circulating B cells in neuromyelitis optica
Source: PubMed Central journal article supplement (PMC5889028; doi:10.1093/brain/awy010), 2018-02-13

## Supplementary Material

### Supplementary Figure 1. Summary of the B cell lineage differentiation and associated cell-surface phenotypes.

Bone marrow emigrant naïve antigen-inexperienced B cells encounter antigen and T cells in a germinal centre. Germinal centres are most commonly located in lymph nodes and spleen. The T cells express CD40L and secrete IL-2, IL-21 and TNF $\alpha$ , amongst other factors which help naïve B cells differentiate into CD27<sup>+</sup> unswitched (IgD<sup>+</sup>) and switched (IgG<sup>+</sup>) memory B cells. These then differentiate into antibody-secreting cells (below the dashed line: plasmablasts, short- and long-lived plasma cells) whose survival is supported by IL-6, BAFF and APRIL. Short-lived plasma cells may reside in tissues including bone marrow. Long-lived plasma cells typically niche in the bone marrow, but can reside in the CNS in states of inflammation. Antibodies in blue=IgG, red=IgD; yellow=IgM.

### Supplementary Figure 2. Effects of immunotherapies and antibody-secreting cell phenotype.

A. Resting B cell subsets from patients with and without mycophenolate mofetil (MMF) administration. B. No effects of freeze-thaw on IgG production from PBMC cultures under varying conditions for cells with membrane-bound CD40L co-cultures. Very similar results obtained in conditions with soluble CD40L and without CD40L (not shown). CD138 (C, blue) and CD20 (D, black) cells are shown within the CD19<sup>+</sup>CD27<sup>++</sup>CD38<sup>++</sup> antibody-secreting cells generated *in vitro*. A mean of 60% of the CD19<sup>+</sup>CD27<sup>++</sup>CD38<sup>++</sup> antibody secreting cells expressed CD20 (mean 60%, range 18–93) and a mean of 15% expressed CD138 (range 1-41). E. Total IgG production across all tested conditions in patients stratified by MMF, corticosteroids and their doses (F), and the percentage of B cell subsets in blood (G).

### Supplementary Figure 3. Relationships between *in vitro* generation of total IgG (ng/ml) and AQP4-specific IgG ( $\Delta$ MFI) across 21 culture conditions.

Absolute values in cells are accompanied by corresponding heat maps. Black = no CD40L; blue = soluble CD40L (sCD40L); red = membrane-bound CD40L (mCD40L).

**Supplementary Figure 4. *In vitro* culture observations.** From wells with R848 and IL-2, supernatant IgG levels did not vary with addition of CD40L (A). From wells with IL-21, without IL-2, addition of CD40L (membrane or soluble) generated more IgG *in vitro* (p=0.0002, Mann Whitney U test; B). Total IgG per well correlated strongly with the

percentage of ASCs per well (black, Spearman's  $r = 0.71$ ,  $p < 0.0001$ ), and more modestly with tetanus-IgG (IU/ml; blue, Spearman's  $r = 0.46$ ,  $p = 0.0084$ ), but not with AQP4-IgG generated per well (C; red,  $\Delta$ MFI). AQP4-IgG levels in culture supernatants did not vary with days from illness onset, days since last clinical relapse and duration of immunotherapy (time parameters, left y-axis) or with corticosteroid dose, dose of mycophenolate mofetil (MMF) or number of immunotherapies (D; immunotherapy parameters, right y-axis).

## Supplementary methods

Peripheral Blood Mononuclear Cells were isolated from whole blood using a Ficoll gradient (Ficoll-Paque, GE Healthcare). Phases were separated by centrifugation at 400 g for 30 min at room temperature and slow deceleration. A 3mL sterile pastette was used to isolate the buffy coat layer in a 50mL conical tube. The cells were washed with PBS/1%BSA twice (200g, 10 minutes, RT, medium acceleration and deceleration). The cells were counted using 0.04% Trypan Blue exclusion and frozen at  $10-20 \times 10^6$  per mL per cryovial in B cell medium (RPMI 1640 without phenol red, 5% FBS, 1% Penicillin/Streptomycin, 1% Glutamax, 0.1% beta-mercaptoethanol, 0.1% IgG-depleted transferrin (20  $\mu$ g/ml)) with 40% Fetal Bovine Serum (FBS) and 10% DMSO chilled on ice. Cryovials containing cells were placed in a CoolCell® Cell Freezing Container (BioCision) and maintained at  $-80$  °C for 24-72 hours before being transferred to liquid nitrogen tanks.

To thaw cells, the cryovials were removed from liquid nitrogen tanks into dry ice containers. Vials were thawed immediately with shaking in a lukewarm water bath. No more than two cryovials were thawed at the same time. The cell suspension was transferred dropwise to a 50mL conical tube containing 9 ml cold B cell medium per 1 ml of thawed cell suspension. The cells were washed twice with B cell medium (200g, 10 minutes) and counted. Viability was assessed using 0.04% Trypan Blue exclusion and ranged from 70–85% of the fresh cells). Cells were re-suspended in B cell medium at appropriate cell concentrations.

**Supplementary Table 1. B cell subsets from 12 NMOSD patients and age- ( $\pm 5$  years) and sex-matched healthy control (HC) subjects. HCs listed in order of matching to the patients 1-12. Percentages represent gating strategies from Figure 1.**

| Patient number or Healthy control | Age | Sex | CD19+ | Plasmablasts | Switched Memory | Unswitched Memory | Naïve | Double negative |
|-----------------------------------|-----|-----|-------|--------------|-----------------|-------------------|-------|-----------------|
| 1                                 | 41  | f   | 2.65  | 1.36         | 17.4            | 9.93              | 66.9  | 4.43            |
| 2                                 | 67  | f   | 5.33  | 0.2          | 4.52            | 2.86              | 89.7  | 2.73            |
| 3                                 | 36  | f   | 6.89  | 0.19         | 10.6            | 6.83              | 79.5  | 2.91            |
| 4                                 | 54  | f   | 16.9  | 0.51         | 11.4            | 11.4              | 73    | 4.08            |
| 5                                 | 44  | m   | 5.09  | 0.27         | 4.19            | 3.14              | 75.7  | 16.7            |
| 6                                 | 55  | f   | 22.6  | 0            | 4.17            | 2.34              | 90.7  | 2.78            |
| 7                                 | 68  | f   | 6.54  | 0.095        | 26              | 35.7              | 35.1  | 3.72            |
| 8                                 | 77  | f   | 4.6   | 0.11         | 30.6            | 21.7              | 41.5  | 6.11            |
| 9                                 | 54  | f   | 6.19  | 0.31         | 22.2            | 20.9              | 54.2  | 2.4             |
| 10                                | 18  | f   | 10.8  | 0.13         | 19.1            | 8.27              | 68    | 4.6             |
| 11                                | 59  | f   | 0.002 | 0            | 0               | 0                 | 100   | 0               |
| 12                                | 38  | f   | 0.079 | 0            | 31.8            | 0                 | 16.7  | 51.5            |
| HC                                | 36  | f   | 6.93  | 0.28         | 20              | 26.7              | 68.8  | 3.11            |
| HC                                | 66  | f   | 10.8  | 0.026        | 16.3            | 18.6              | 43.3  | 3.72            |
| HC                                | 34  | f   | 8.76  | 0.081        | 24.9            | 28.2              | 49.5  | 3.9             |
| HC                                | 50  | f   | 3.16  | 0.058        | 17              | 21.1              | 77.1  | 1.7             |
| HC                                | 43  | m   | 7.04  | 0.3          | 4.96            | 16                | 57.2  | 4.69            |
| HC                                | 56  | f   | 8.2   | 0.089        | 12.3            | 13.8              | 77.4  | 3.23            |
| HC                                | 72  | f   | 7.75  | 0.25         | 10.8            | 4.25              | 72.3  | 1.69            |
| HC                                | 76  | f   | 3.06  | 1.11         | 5.28            | 13.3              | 75    | 2.18            |
| HC                                | 50  | f   | 5.86  | 1.76         | 6.45            | 11.2              | 61.9  | 3.2             |
| HC                                | 21  | f   | 14.3  | 0.18         | 6.85            | 2.27              | 88.5  | 2.23            |
| HC                                | 61  | f   | 7.51  | 0.19         | 13.4            | 9.33              | 82    | 2.84            |
| HC                                | 28  | f   | 8.89  | 0.63         | 12.9            | 14.9              | 78.6  | 1.89            |



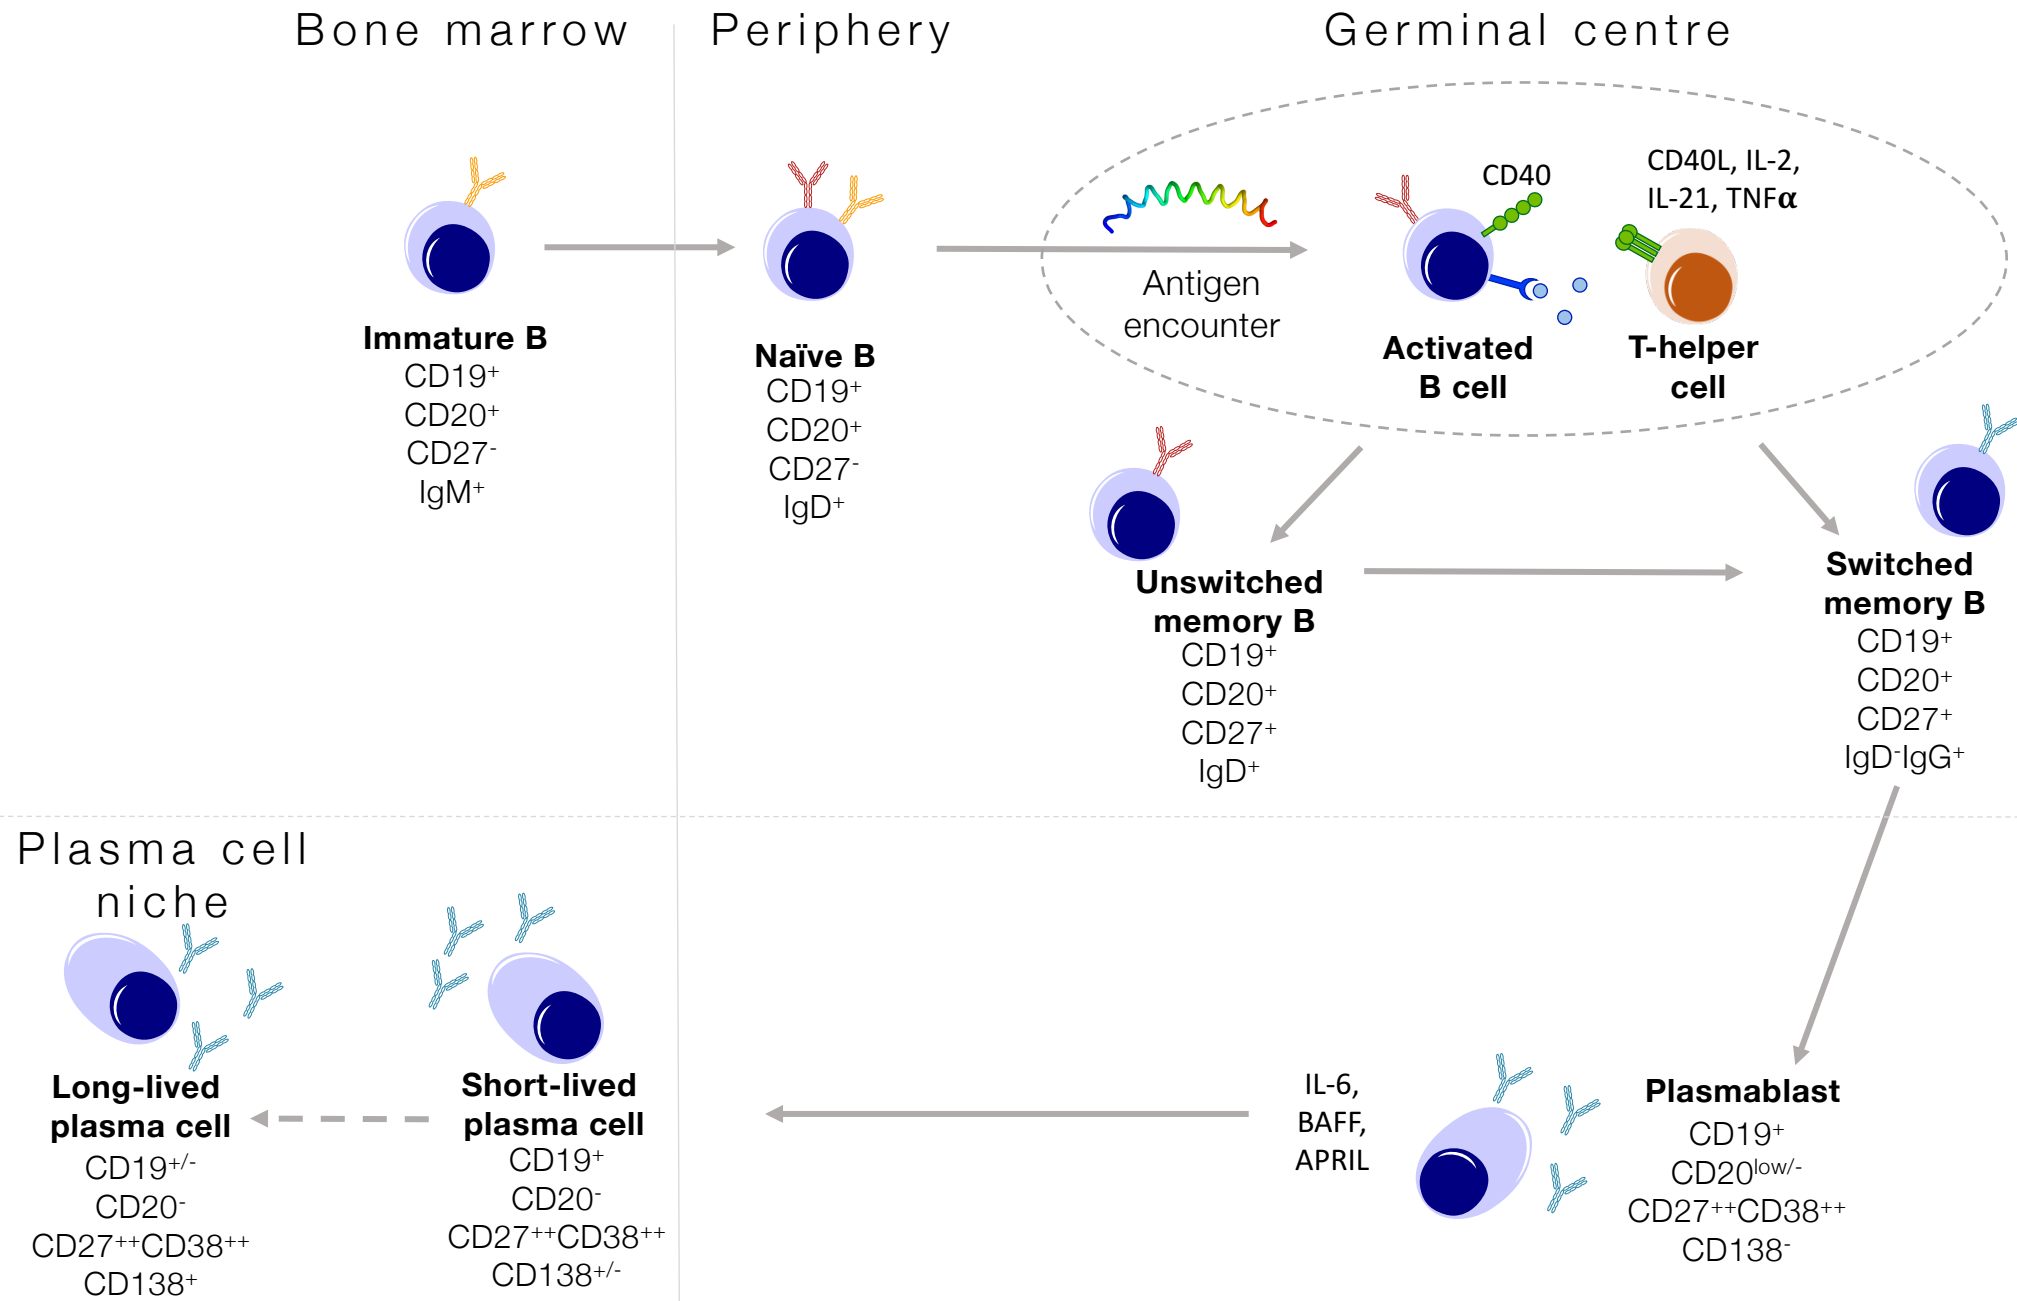

Supplementary Figure 1

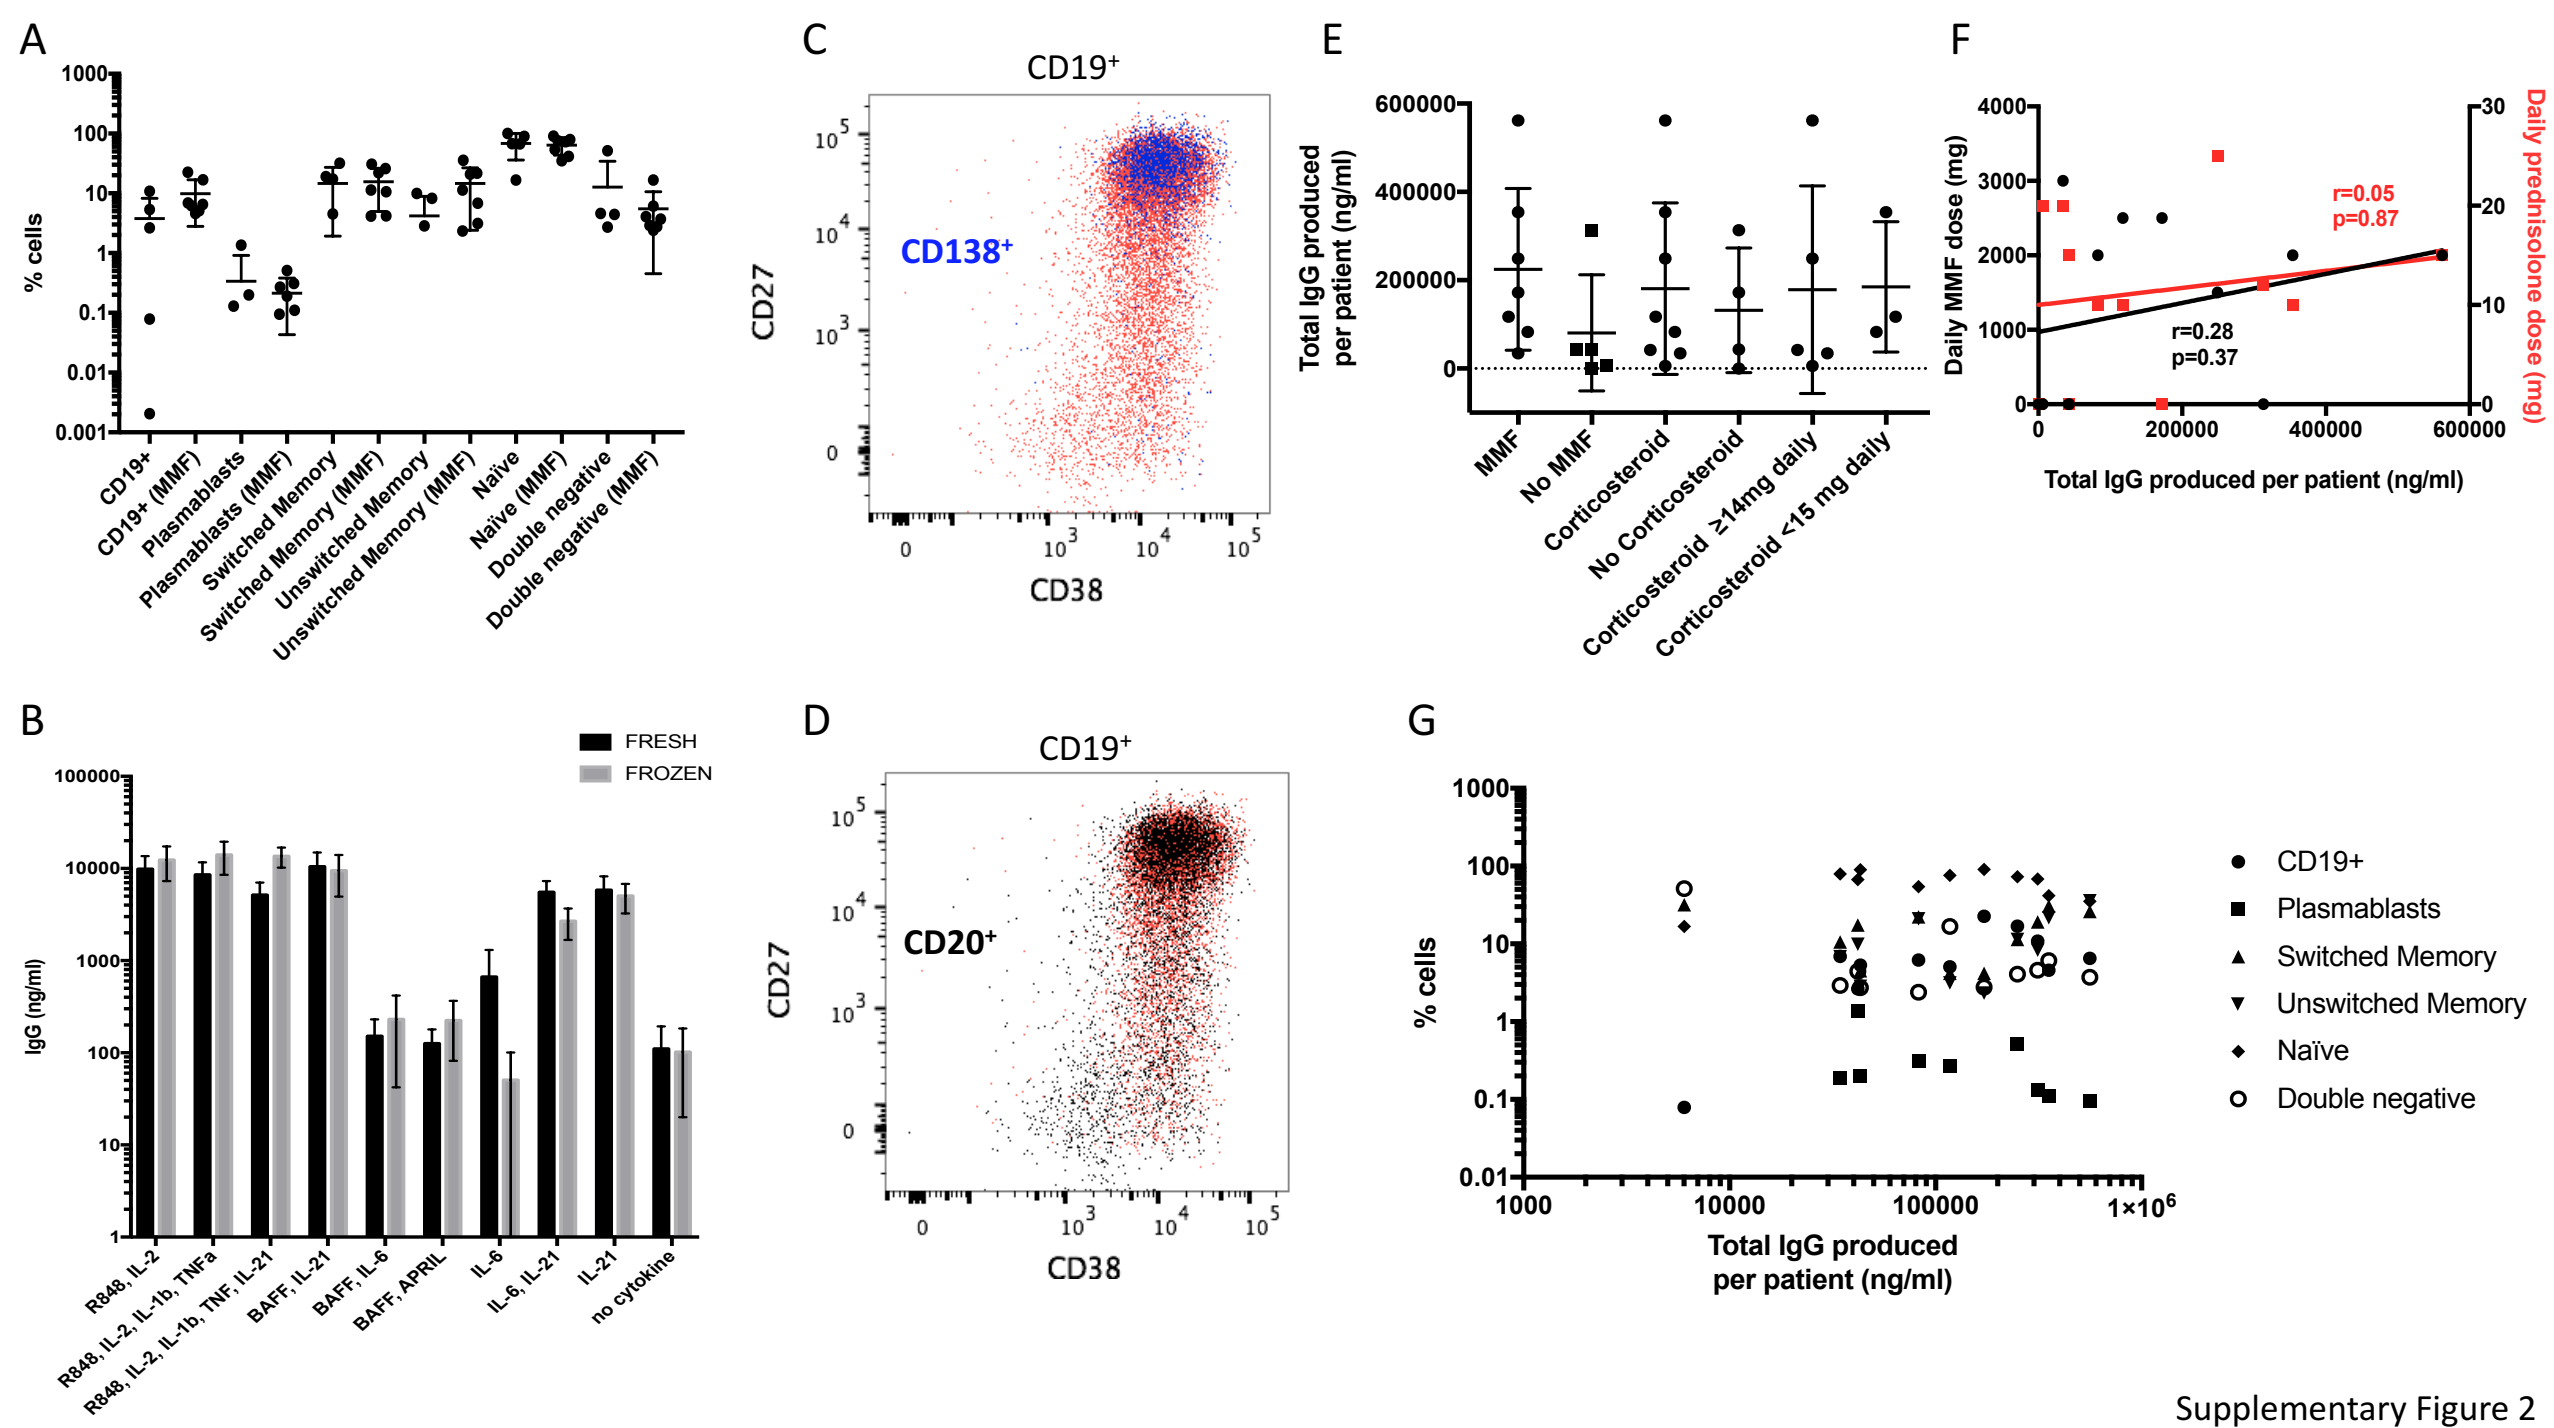

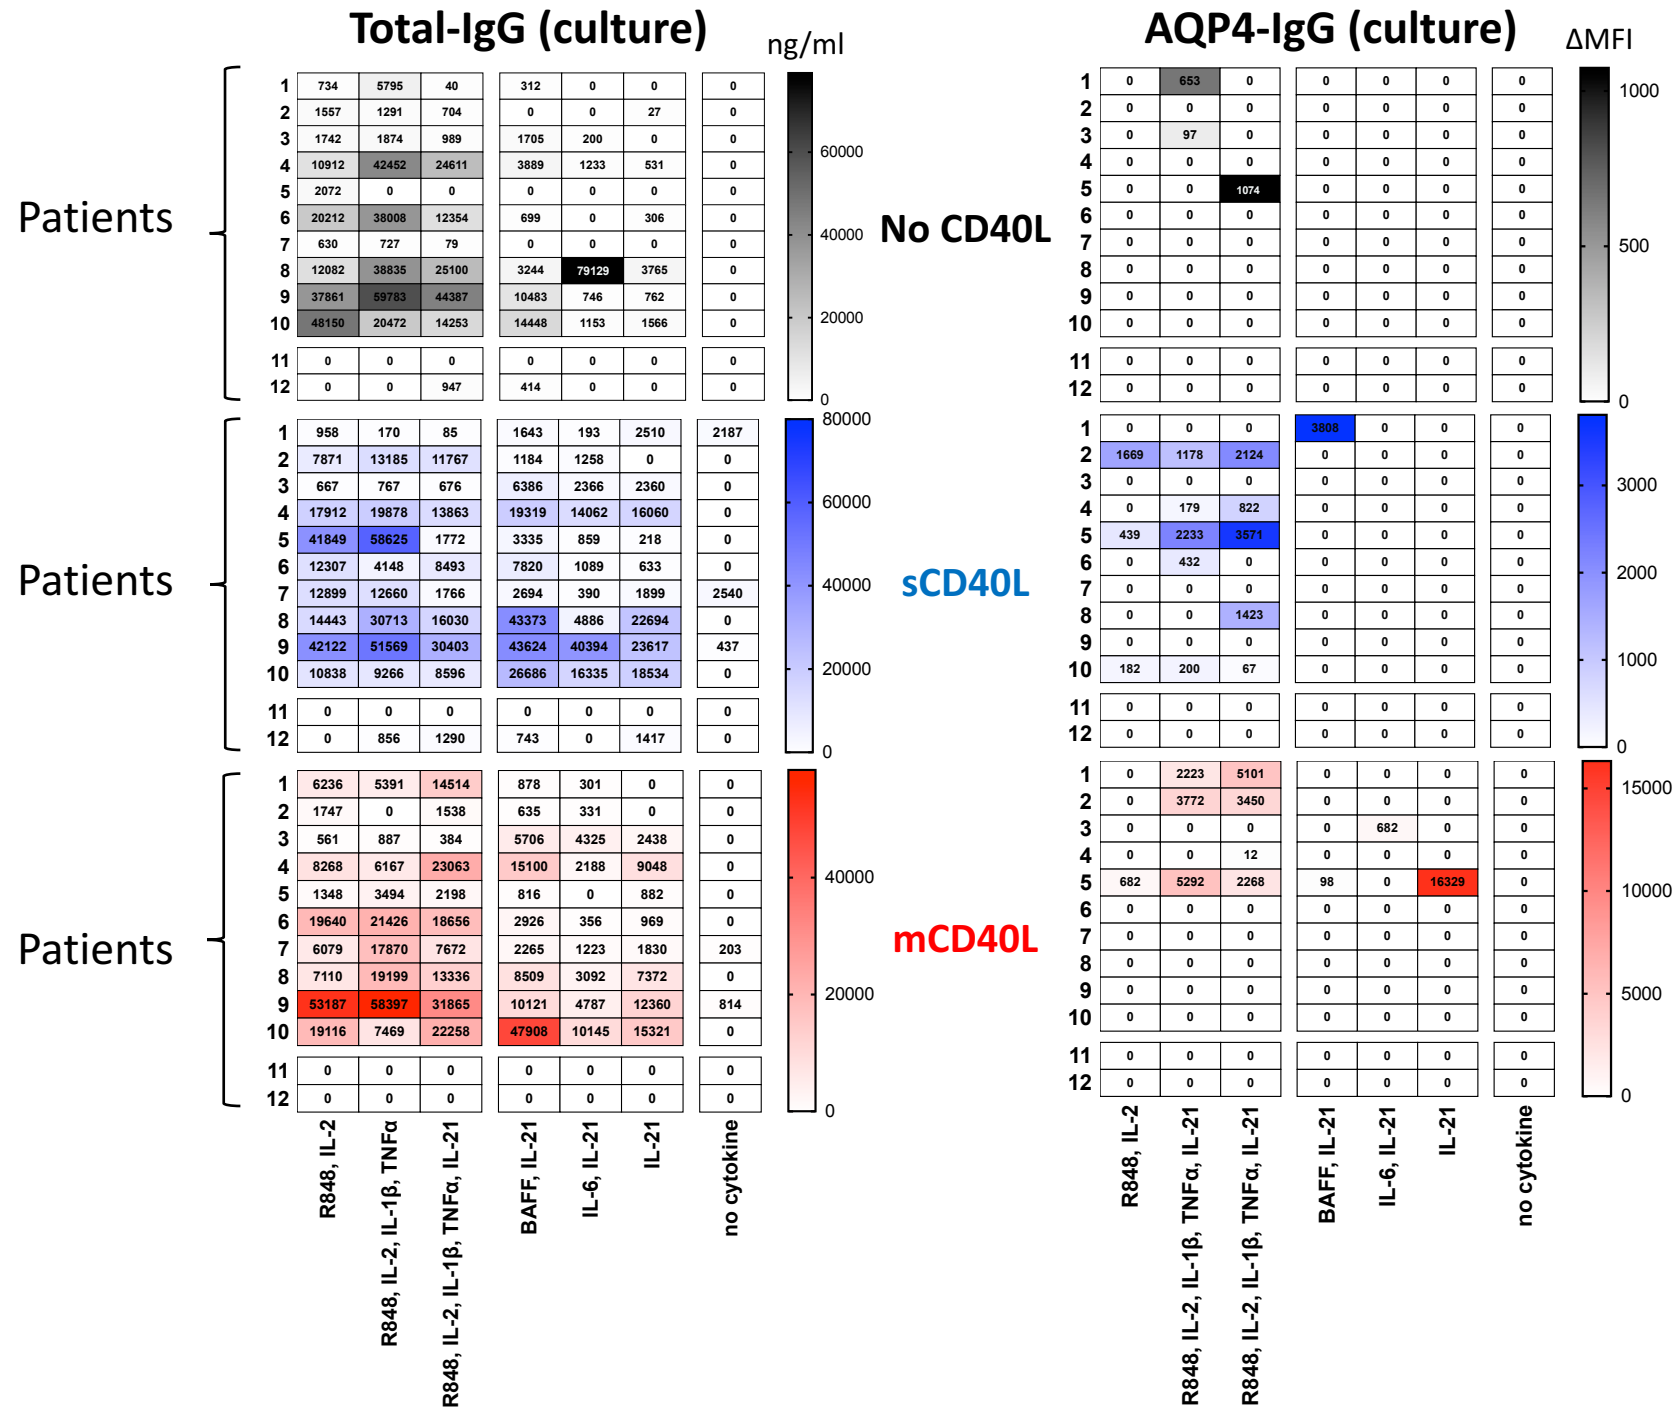

Supplementary Figure 3



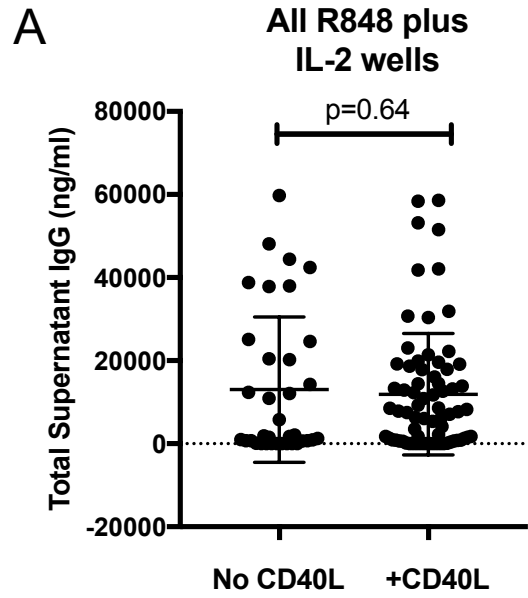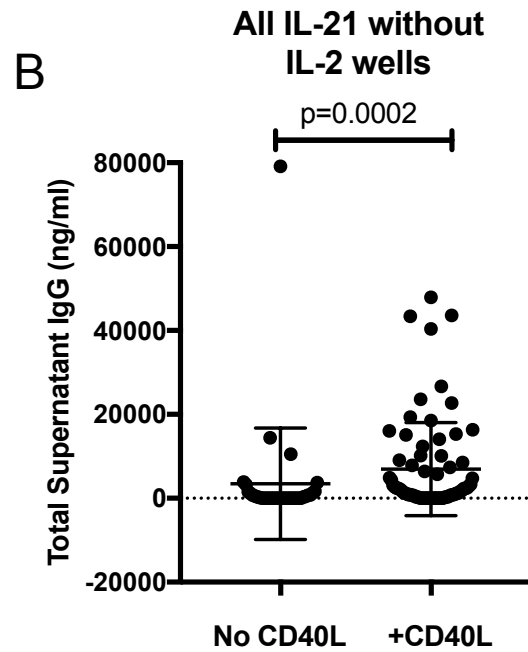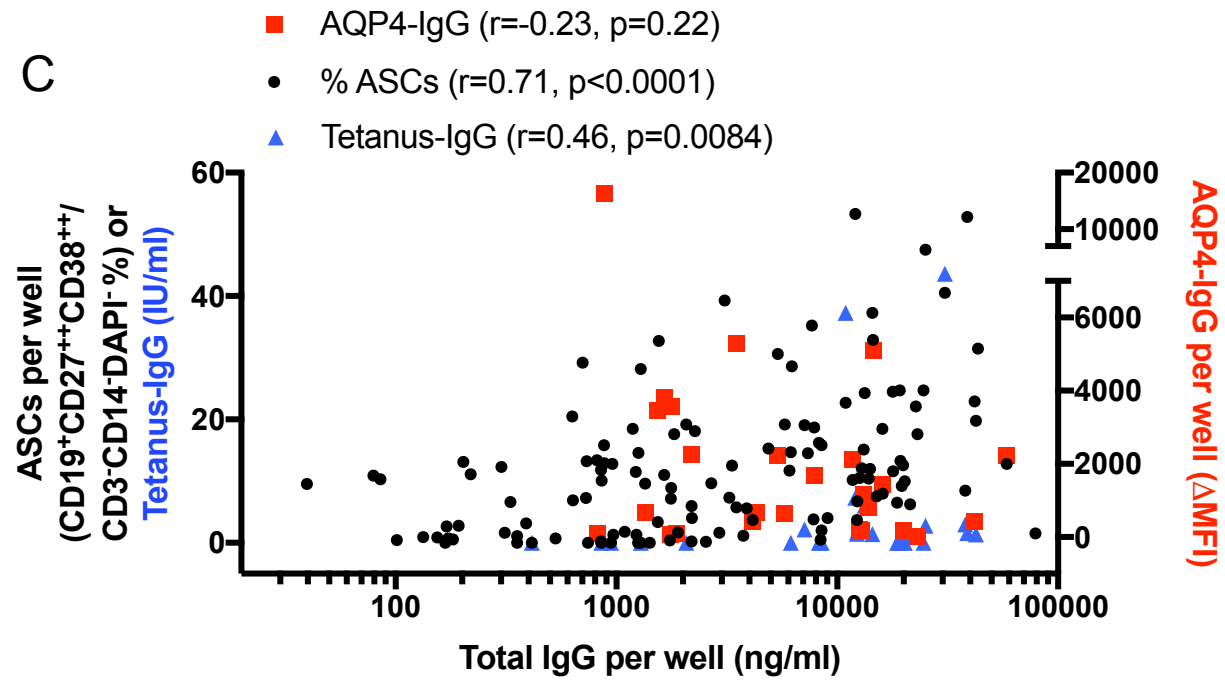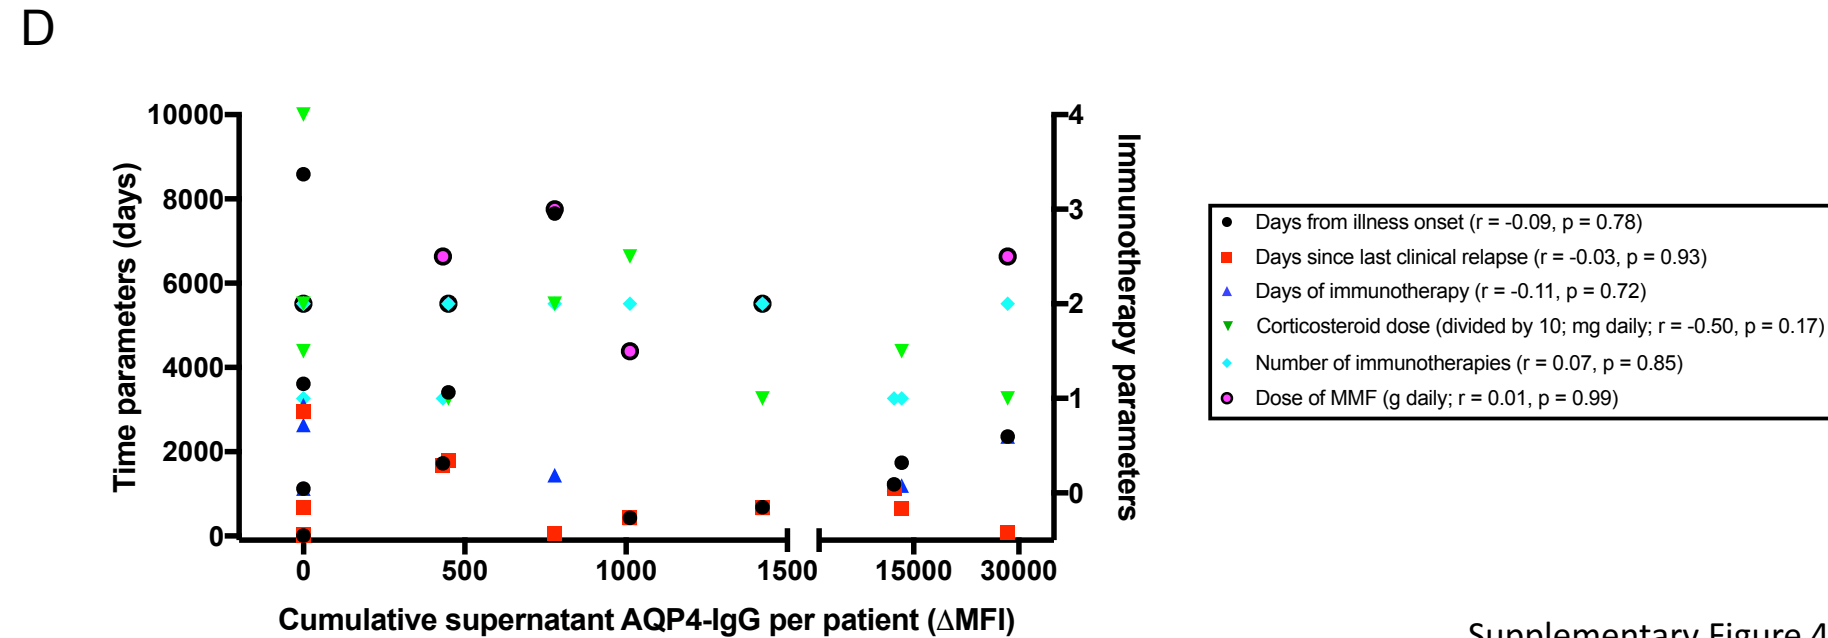

Supplement: supplementary_data_awy010.pdf [file supplementary_data_awy010.pdf]
